# Supplementary material for: Gate tunable photovoltaic effect in a MoSe2 homojunction enabled with different thicknesses
Source: Royal Society of Chemistry journal article supplement (doi:10.1039/c7tc01806a), 2017-01-01
Supplement: c7tc01806a1.pdf [file c7tc01806a1.pdf]

## Gate tunable photovoltaic effect in MoSe<sub>2</sub> homojunction enabled with different thickness

Received 00th January 20xx,  
Accepted 00th January 20xx

Yujue Yang,<sup>a</sup> Nengjie Huo<sup>a</sup> and Jingbo Li<sup>\*a,b</sup>

DOI: 10.1039/x0xx00000x

www.rsc.org/

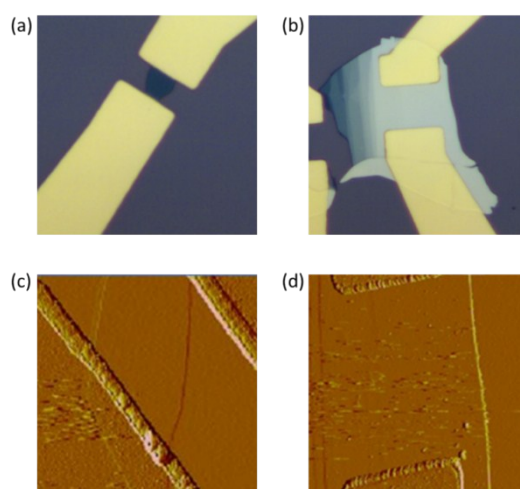

**Fig. S1** (a, b) Optical microscope images of the MoSe<sub>2</sub> devices with thin and thick flakes, respectively, and with Ti (2 nm)/Au (50 nm) electrodes. (c, d) Atomic force microscopy (AFM) images of thin and thick MoSe<sub>2</sub> flakes, depicting ~4 nm and ~28 nm, respectively.

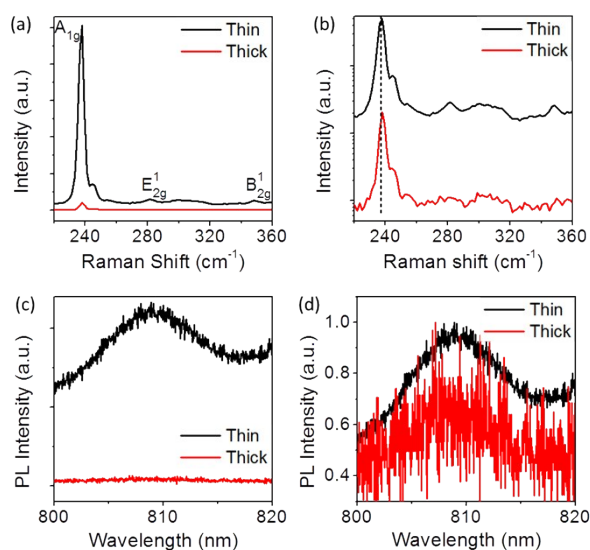

**Fig. S2** (a, b) Linear and Log plot of raman spectra of the thin and thick MoSe<sub>2</sub> flakes, respectively. (c, d) PL and Normalized PL spectra of the thin and thick MoSe<sub>2</sub>. The obvious E<sub>2g</sub><sup>1</sup> and B<sub>2g</sub><sup>1</sup> Raman modes were observed in thin flakes corresponding to few layer characteristics, while both modes disappeared in thick flakes corresponding to bulk feature. All these Raman phenomena are very consistent with previous reports.<sup>31</sup> we can observe the weak PL peak at 809 nm from thin flakes due to the radiation recombination of band gap of 1.53 eV. Also the Raman and PL intensity is much dropped in bulk compared to that in few layer flakes.

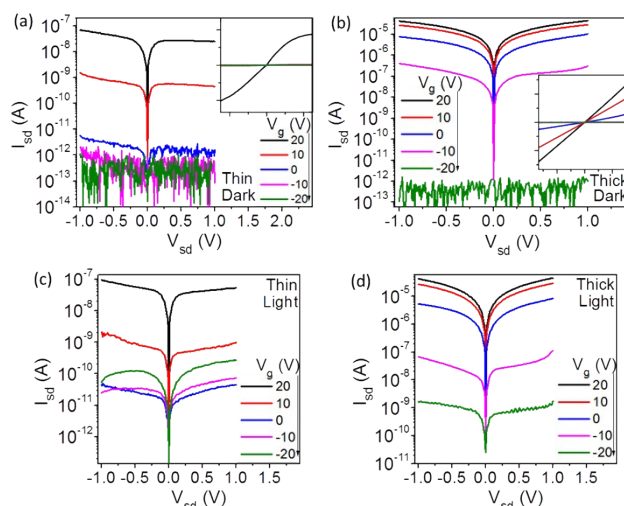

**Fig. S3** (a, b) Output characteristic of the device based on thin and thick MoSe<sub>2</sub> flakes, respectively in the dark state. The insets are corresponding I-V curves with linear scale of y-axis. In both devices with same thickness, the output curves under dark are nearly symmetrical and linear indicating the negligible contact barrier. (c, d) Output curves of the thin and thick MoSe<sub>2</sub> device under light illumination, respectively. No photovoltaic effect under light illumination in these control devices are observed, which confirms that the lateral homojunction indeed contributes to the photovoltaic property of our homojunction device.

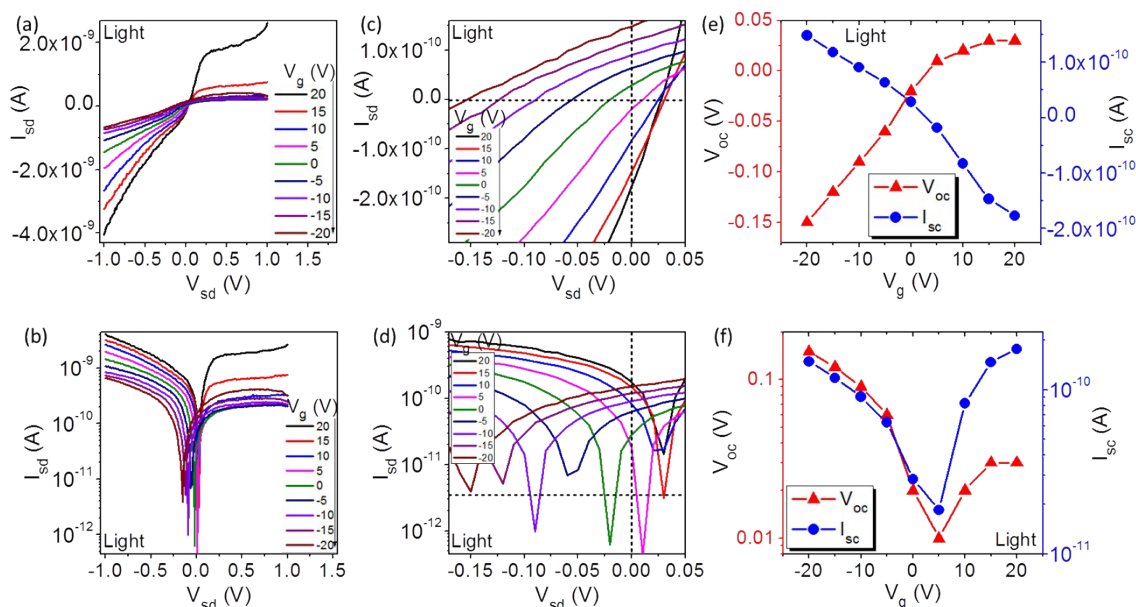

**Fig. S4** (a, b) Output curves of another MoSe<sub>2</sub> homojunction device under light illumination in linear and log scale, respectively. Enlarged linear (c) and log (d) plot of output characteristic of the device. (e, f) Open-circuit voltage  $V_{oc}$  and short-circuit current  $I_{sc}$  as a function of back-gate voltage  $V_g$  in linear and log scale, respectively. In this device, we also observed the significant and gate tunable photovoltaic effect. These phenomena are similar to that of our fabricated MoSe<sub>2</sub> homojunction device in the text, indicating that our work is reliable and repeatable.

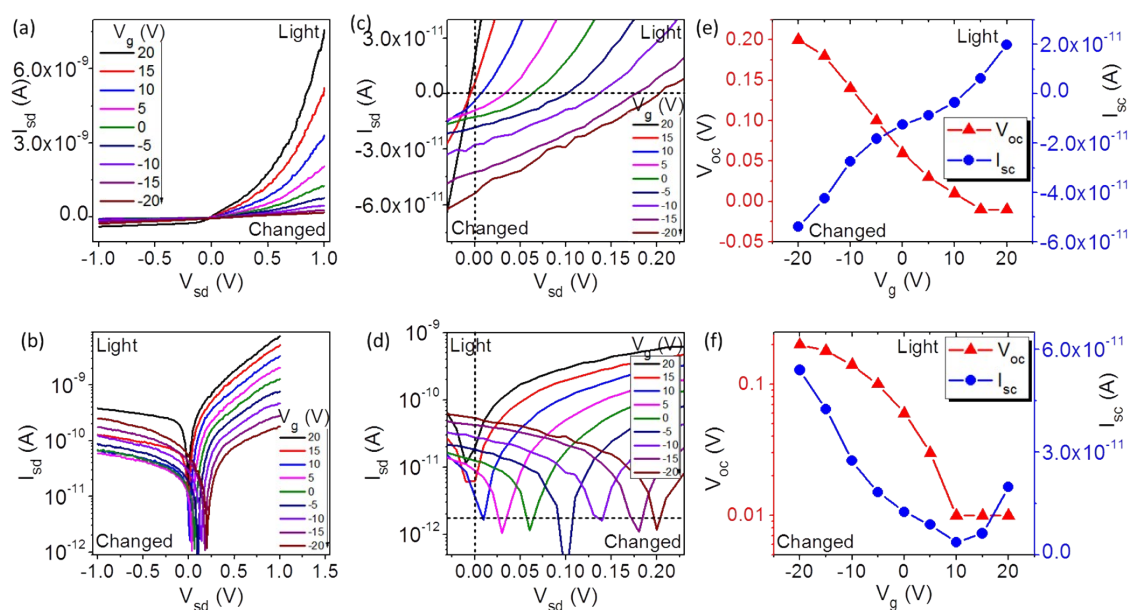

**Fig. S5** The corresponding performances of the homojunction device when the source and drain was switched. Compared to the performance shown in Fig. S4, the gate-tunable  $V_{oc}$  and  $I_{sc}$  was inverted by switching the source and drain.

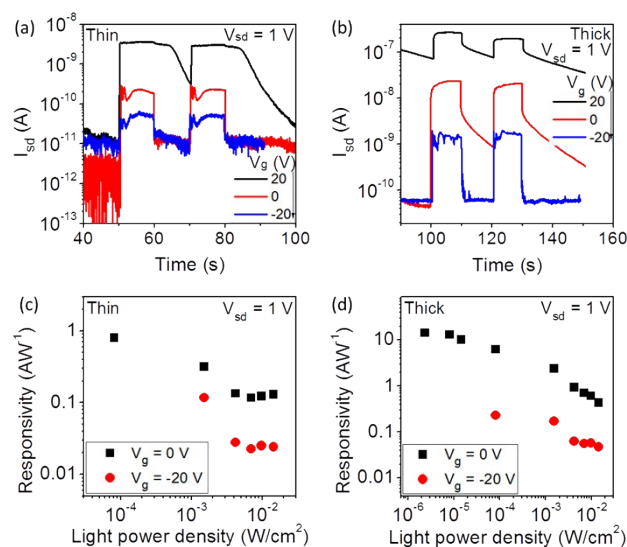

**Fig. S6** (a, b) Time-resolved photoresponse of the thin and thick MoSe<sub>2</sub> device, respectively, for different back gate  $V_g$  measured at  $V_{sd} = 1$  V. (c, d) Dependence of the responsivity on illumination intensity for thin and thick device, respectively. The responsivity in these devices with same thickness is much lower than that in the MoSe<sub>2</sub> homojunction device at a bias voltage  $V_{sd}$  of 1 V. These results indicate that the homojunction device can not only possess gate tunable photovoltaic property but also improve the photo-response in term of the temporal response and responsivity.
